# Supplementary material
Source: publisher site journal article supplement (https://www.dovepress.com/article/271091)
Supplement: Supplementary file 1 [file get_supplementary_file.php]

## Supplementary materials

**Supplement 1. Table S1.** The demographic and clinical characteristics of the enrolled patients and healthy subjects

| Parameters       | Healthy control (n=40) | CHC (n=20) | EBV (n=10) | CMV (n=10) | HSV (n=10) | CHB (n=20) | P value |
|------------------|------------------------|------------|------------|------------|------------|------------|---------|
| AGE              | 39.9±14.60             | 42.2±5.80  | 41.8±13.49 | 42.8±10.38 | 47.8±11.24 | 43.9±14.32 | 0.511   |
| Male (%)         | 24(60%)                | 11(55%)    | 7(70%)     | 4(40%)     | 6(60%)     | 11(55%)    | 0.102   |
| HCV(log10)       | -                      | 6.13±1.15  | -          | -          | -          | -          |         |
| EBV(log10)       | -                      | -          | 3.61±1.53  | -          | -          | -          |         |
| CMV(log10)       | -                      | -          | -          | 2.94±0.62  | -          | -          |         |
| HSV(log10)       | -                      | -          | -          | -          | 3.03±0.70  | -          |         |
| HBV(log10)       | -                      | -          | -          | -          | -          | 6.03±1.53  |         |
| HBV-miR-3(log10) | -                      | -          | -          | -          | -          | 5.24±1.58  | <0.001  |

— negative

### Supplement 2. Figure S1

**Fig. A** Negative correlation between PTEN protein expression and HBV-miR-3 levels in HepG2 cells.

**Fig. B** Negative correlation between PTEN protein expression and HBV-miR-3 levels in HepAD38 cells.

**Fig.C** Statistical chart of apoptosis in HepG2 cells.

**Fig.D** Statistical chart of apoptosis in HeAD38 cells.

**Fig.E** Statistical chart of colony formation in HepG2 cells.

**Fig.F** Statistical chart of colony formation in HepAD38 cells.

**Fig.G** Statistical chart of cell migration in HepG2 cells.

**Fig.H** Statistical chart of cell migration in HepAD38 cells.

Supplement 2

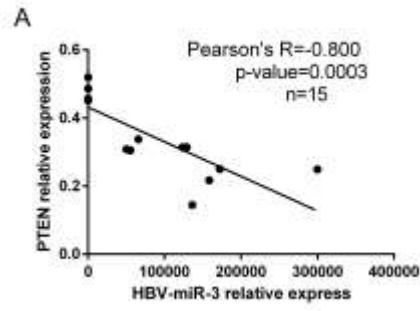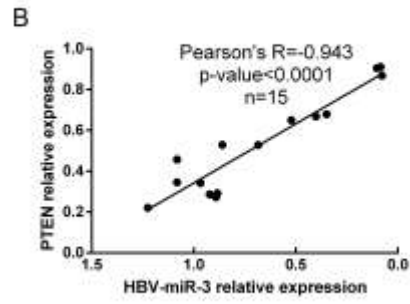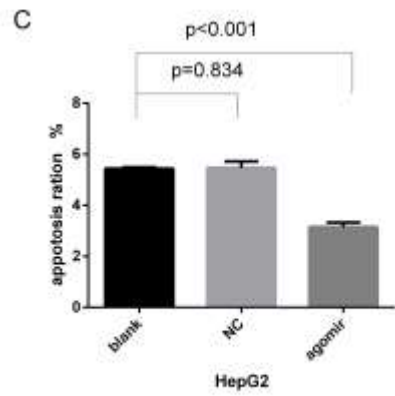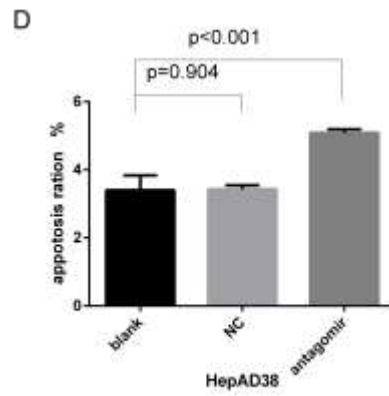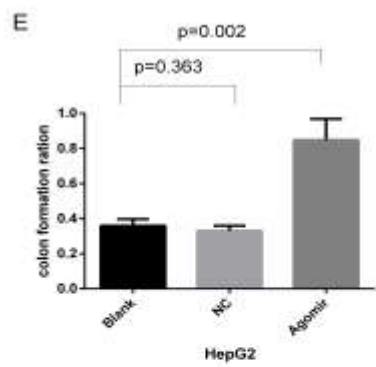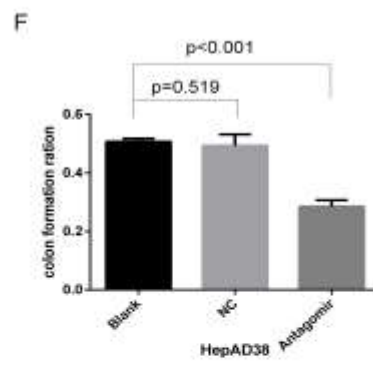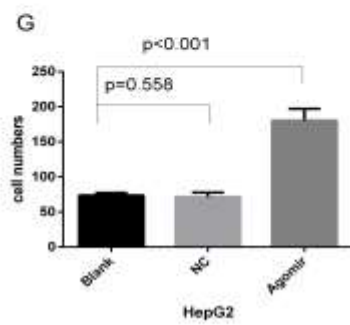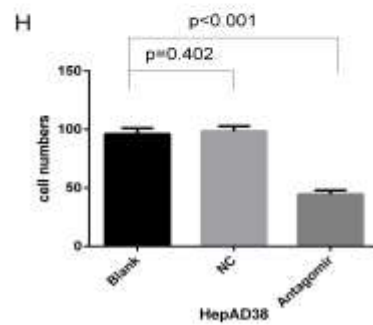

### Supplement 3

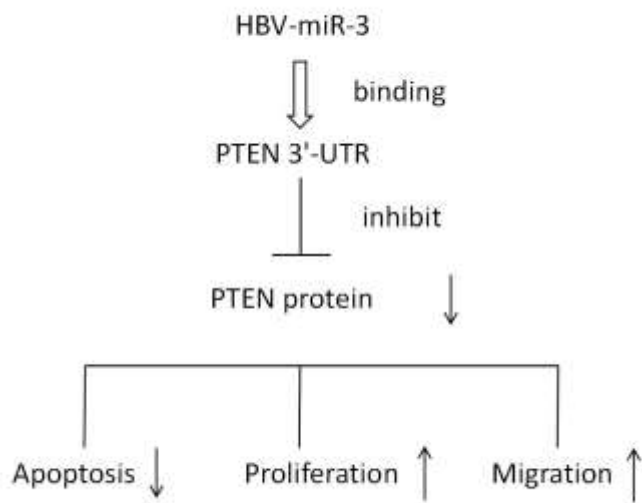

**Figure S2:** Model of HBV-miR-3 regulation of proliferation, migration and apoptosis in hepatocellular carcinoma cells by targeting PTEN. ↑:up-regulation ↓:down-regulation
